# Supplementary material for: Using a dual-emission Sm(iii)-macrocycle as the perceptive lab-on-a-molecule chemosensor toward selective and discriminative detection of nitroaromatic explosives
Source: Royal Society of Chemistry journal article supplement (doi:10.1039/d3nj00627a), 2023-01-01
Supplement: d3nj00627a1.pdf [file d3nj00627a1.pdf]

## Electronic Supplementary Information

### Using a dual-emission Sm(III)-macrocycle as the perceptive lab-on-a-molecule chemosensor toward selective and discriminative detection of nitroaromatic explosives

Chengjian Zhang, Ruijie Zheng, Sichen Li, Kang Yang, Shengdi Tai, Yinsong Tao, Shishen Zhang and Kun Zhang\*

School of Chemistry and Chemical Engineering, Key Laboratory of Surface & Interface Science of Polymer Materials of Zhejiang Province, Zhejiang Sci-Tech University, Hangzhou 310018, P. R. China

#### Crystal structure determination and refinement

A high-quality single-crystal sample of complex **Sm-2<sub>1</sub>** was covered with glue and mounted on glass fiber for data collection. Crystallographic data were collected at 150(2) K on a Bruker SMART 1K CCD diffractometer, using graphite mono-chromated MoK $\alpha$  radiation ( $\lambda = 0.71073$  Å). Absorption corrections were performed to all data and the structure was solved by direct method and refined by full-matrix least-squares method on  $F_{\text{obs}}^2$  by using the SHELXTL-PC software package [1]. All non-H atoms were anisotropically refined and all hydrogen atoms were inserted in the calculated positions assigned fixed isotropic thermal parameters and allowed to ride on their respective parent atoms. A summary of the crystal data, experimental details and refinement results for **Sm-2<sub>1</sub>** was listed in Table S1. Selected bond lengths and bond angles of **Sm-2<sub>1</sub>** were tabulated in Table S2, and hydrogen bond parameters were shown in Table S3.

#### References

- 1 Sheldrick, G. M. SHELXTL (Version 6.10). Software Reference Manual; Madison, Wisconsin (USA): Bruker AXS, Inc.: **2000**.

## Tables

**Table S1** Crystal data and structural refinements for **Sm-2<sub>1</sub>**.

| Complex                                                                                  | <b>Sm-2<sub>1</sub></b>                                                             |
|------------------------------------------------------------------------------------------|-------------------------------------------------------------------------------------|
| Empirical formula                                                                        | C <sub>30</sub> H <sub>31</sub> BrCl <sub>2</sub> N <sub>5</sub> O <sub>10</sub> Sm |
| Formula weight                                                                           | 922.76                                                                              |
| Temperature / K                                                                          | 293(2)                                                                              |
| Wavelength / Å                                                                           | 0.71073                                                                             |
| Crystal Size (mm)                                                                        | 0.14×0.21×0.26                                                                      |
| Crystal system                                                                           | Monoclinic                                                                          |
| Space group                                                                              | C2/c                                                                                |
| <i>a</i> / Å                                                                             | 43.493(3)                                                                           |
| <i>b</i> / Å                                                                             | 8.4563(6)                                                                           |
| <i>c</i> / Å                                                                             | 18.8102(15)                                                                         |
| $\alpha$ / °                                                                             | 90                                                                                  |
| $\beta$ / °                                                                              | 93.291(2)                                                                           |
| $\gamma$ / °                                                                             | 90                                                                                  |
| <i>V</i> / Å <sup>3</sup>                                                                | 6906.8(9)                                                                           |
| <i>Z</i> / <i>D</i> <sub>calcd</sub> (g / cm <sup>3</sup> )                              | 8/1.775                                                                             |
| <i>F</i> (000)                                                                           | 3656                                                                                |
| $\mu$ / mm <sup>-1</sup>                                                                 | 3.074                                                                               |
| <i>h</i> <sub>min</sub> / <i>h</i> <sub>max</sub>                                        | -52/56                                                                              |
| <i>k</i> <sub>min</sub> / <i>k</i> <sub>max</sub>                                        | -10/11                                                                              |
| <i>l</i> <sub>min</sub> / <i>l</i> <sub>max</sub>                                        | -24/24                                                                              |
| Data / parameters                                                                        | 8050/442                                                                            |
| <i>R</i> <sub>1</sub> , <i>wR</i> <sub>2</sub> [ <i>I</i> > 2σ( <i>I</i> )] <sup>a</sup> | <i>R</i> <sub>1</sub> = 0.0406, <i>wR</i> <sub>2</sub> = 0.0803                     |
| <i>R</i> <sub>1</sub> , <i>wR</i> <sub>2</sub> (all data) <sup>a</sup>                   | <i>R</i> <sub>1</sub> = 0.0730, <i>wR</i> <sub>2</sub> = 0.0906                     |
| <i>S</i>                                                                                 | 1.00                                                                                |
| Max/min Δρ/e Å <sup>-3</sup>                                                             | 1.05/-0.99                                                                          |

$$^a R_1 = \sum ||F_o| - |F_c|| / \sum |F_o|, wR_2 = [\sum [w(F_o^2 - F_c^2)^2] / \sum w(F_o^2)^2]^{1/2}$$

**Table S2** Selected bond distances (Å) and angles (°) in **Sm-2<sub>1</sub>**.

| Bond distances          |          | Bond angles |            |
|-------------------------|----------|-------------|------------|
| <b>Sm-2<sub>1</sub></b> |          |             |            |
| Sm1–O1                  | 2.319(3) | O1–Sm1–O2   | 120.74(9)  |
| Sm1–O2                  | 2.723(3) | O1–Sm1–O3   | 174.83(10) |
| Sm1–O3                  | 2.675(3) | O1–Sm1–O4   | 68.92(9)   |
| Sm1–O4                  | 2.355(3) | O1–Sm1–O5   | 116.98(10) |
| Sm1–O5                  | 2.581(3) | O1–Sm1–O6   | 73.81(10)  |
| Sm1–O6                  | 2.529(3) | O1–Sm1–O8   | 70.53(10)  |

|        |          |           |            |
|--------|----------|-----------|------------|
| Sm1-O8 | 2.579(4) | O1-Sm1-O9 | 109.11(11) |
| Sm1-O9 | 2.499(4) | O1-Sm1-N2 | 66.26(10)  |
| Sm1-N2 | 2.688(4) | O1-Sm1-N3 | 117.45(10) |
| Sm1-N3 | 2.610(3) | O2-Sm1-O3 | 59.43(9)   |
|        |          | O2-Sm1-O4 | 137.50(9)  |
|        |          | O2-Sm1-O5 | 70.33(10)  |
|        |          | O2-Sm1-O6 | 72.06(10)  |
|        |          | O2-Sm1-O8 | 127.18(10) |
|        |          | O2-Sm1-O9 | 80.64(10)  |
|        |          | O2-Sm1-N2 | 62.83(10)  |
|        |          | O2-Sm1-N3 | 121.70(10) |
|        |          | O3-Sm1-O4 | 114.76(9)  |
|        |          | O3-Sm1-O5 | 68.16(10)  |
|        |          | O3-Sm1-O6 | 110.53(10) |
|        |          | O3-Sm1-O8 | 105.07(10) |
|        |          | O3-Sm1-O9 | 65.72(11)  |
|        |          | O3-Sm1-N2 | 110.91(10) |
|        |          | O3-Sm1-N3 | 62.31(10)  |
|        |          | O4-Sm1-O5 | 69.23(10)  |
|        |          | O4-Sm1-O6 | 72.17(10)  |
|        |          | O4-Sm1-O8 | 95.33(10)  |
|        |          | O4-Sm1-O9 | 138.80(11) |
|        |          | O4-Sm1-N2 | 133.23(10) |
|        |          | O4-Sm1-N3 | 68.55(10)  |
|        |          | O5-Sm1-O6 | 49.63(10)  |
|        |          | O5-Sm1-O8 | 156.31(11) |
|        |          | O5-Sm1-O9 | 133.35(11) |
|        |          | O5-Sm1-N2 | 121.65(10) |
|        |          | O5-Sm1-N3 | 87.10(10)  |
|        |          | O6-Sm1-O8 | 144.32(11) |
|        |          | O6-Sm1-O9 | 148.69(11) |
|        |          | O6-Sm1-N2 | 83.17(11)  |
|        |          | O6-Sm1-N3 | 129.71(10) |
|        |          | O8-Sm1-O9 | 49.76(11)  |
|        |          | O8-Sm1-N2 | 82.04(11)  |
|        |          | O8-Sm1-N3 | 70.19(11)  |
|        |          | O9-Sm1-N2 | 70.68(11)  |
|        |          | O9-Sm1-N3 | 77.89(11)  |
|        |          | N2-Sm1-N3 | 147.12(11) |

---

**Table S3** Intramolecular hydrogen bond parameters (Å, °) in **Sm-2<sub>1</sub>**.

| D–H···A                 | D–H  | H···A | D···A    | ∠DHA |
|-------------------------|------|-------|----------|------|
| <b>Sm-2<sub>1</sub></b> |      |       |          |      |
| N1–H1···O1              | 0.98 | 1.95  | 2.689(4) | 132  |
| N1–H1···O4              | 0.98 | 1.98  | 2.769(4) | 136  |

**Table S4** Bond distances ( $d_{\text{Sm},j}$ ), bond valences ( $v_{\text{Sm},j}$ ) and total samarium atom valence ( $V_{\text{Sm}}$ ) in the crystal structure of **Sm-2<sub>1</sub>**.

| Compound                | Atom                         | Donor type                    | $d_{\text{Sm},j}/\text{Å}$ | $v_{\text{Sm},j}$ | $V_{\text{Sm}}$ |
|-------------------------|------------------------------|-------------------------------|----------------------------|-------------------|-----------------|
| <b>Sm-2<sub>1</sub></b> | N2                           | HL2 <sub>1</sub> <sup>-</sup> | 2.688                      | 0.252             | 2.936           |
|                         | N3                           | HL2 <sub>1</sub> <sup>-</sup> | 2.610                      | 0.311             |                 |
|                         | O1                           | HL2 <sub>1</sub> <sup>-</sup> | 2.319                      | 0.495             |                 |
|                         | O2                           | HL2 <sub>1</sub> <sup>-</sup> | 2.723                      | 0.166             |                 |
|                         | O3                           | HL2 <sub>1</sub> <sup>-</sup> | 2.675                      | 0.189             |                 |
|                         | O4                           | HL2 <sub>1</sub> <sup>-</sup> | 2.355                      | 0.449             |                 |
|                         | O5                           | NO <sub>3</sub> <sup>-</sup>  | 2.581                      | 0.244             |                 |
|                         | O6                           | NO <sub>3</sub> <sup>-</sup>  | 2.529                      | 0.281             |                 |
|                         | O8                           | NO <sub>3</sub> <sup>-</sup>  | 2.579                      | 0.245             |                 |
| O9                      | NO <sub>3</sub> <sup>-</sup> | 2.499                         | 0.304                      |                   |                 |

**Table S5** Analytical parameters of fluorescent chemosensors studied herein for detection of nitroaromatic explosives.

| chemosensor                                                                                             | Sensing mechanism and effect | NACs    | Linear range     | LOD             | Solvent            | Reference                                       |
|---------------------------------------------------------------------------------------------------------|------------------------------|---------|------------------|-----------------|--------------------|-------------------------------------------------|
| GCDs                                                                                                    | FL quenching                 | TNP     | 0.1-0.15 $\mu$ M | 0.091 $\mu$ M   | Water              | Acta A: Mol. Biomol. Spectrosc. 137 (2015) 1213 |
| sensor 1                                                                                                | FL quenching                 | TNP     | 0-100 $\mu$ M    | 70 ppb          | CH <sub>3</sub> CN | Anal. Chim. Acta 936 (2016) 216                 |
| sensor 2                                                                                                | FL quenching                 | TNP     | 0-100 $\mu$ M    | 300ppb          | CH <sub>3</sub> CN | ACS Appl. Mater. Interfaces. 2017, 9,13415      |
| PI-CONs                                                                                                 | FL enhancement               | TNP     | 0.5-10 $\mu$ M   | 0.25 $\mu$ M    | EtOH               | ACS Appl. Mater. Interfaces. 2017, 9,13415      |
| [Bi(L <sup>1</sup> )(NO <sub>3</sub> ) <sub>3</sub> ] <sub>n</sub>                                      | FL quenching                 | 2,4-DNP | 5-70 $\mu$ M     | 0.0968 $\mu$ M  | DMF                | Sens. Actuators B Chem. 264 (2018) 363          |
| [Bi(L <sup>2</sup> )(NO <sub>3</sub> ) <sub>3</sub> ]                                                   | FL quenching                 | TNP     | 5-55 $\mu$ M     | 0.0924 $\mu$ M  | DMF                | Sens. Actuators B Chem. 264 (2018) 363          |
| BaAlF <sub>5</sub> :Eu <sup>2+</sup> @PEI                                                               | FL quenching                 | TNP     | 1-5 ng/ml        | 0.57ng/ml       | EtOH               | J. Rare Earth. 39 (2021) 952                    |
| BaSiF <sub>6</sub> :Eu <sup>2+</sup> @PEI                                                               | FL quenching                 | TNP     | 3-20 ng/ml       | 2.82ng/ml       | EtOH               | J. Rare Earth. 39 (2021) 952                    |
| L <sub>1</sub>                                                                                          | FL quenching                 | TNP     | NR               | 29.3 $\pm$ 3.7n | THF                | ACS Omega 5 (2020) 25747                        |
| L <sub>1</sub> @C <sub>b</sub>                                                                          | FL quenching                 | TNP     | NR               | M               | THF                | ACS Omega 5 (2020) 25747                        |
| Sensor 3                                                                                                | FL quenching                 | TNP     | NR               | 4.1nM           | DMF                | Spectrochim. Acta A. 226 (2020) 117583          |
| Sensor 4                                                                                                | FL quenching                 | TNP     | NR               | 5.9nM           | DMF                | Spectrochim. Acta A. 226 (2020) 117583          |
| Zn-MOFs 1                                                                                               |                              |         | 0-0.125mM        | 0.79 $\mu$ M    |                    | Cryst. Growth Des. 21 (2021) 5558               |
| Zn-MOFs 2                                                                                               | FL quenching                 | 2-NP    | 0-0.170 mM       | 1.34 $\mu$ M    | Water              | Cryst. Growth Des. 21 (2021) 5558               |
| Zn-MOFs 3                                                                                               | FL quenching                 | 2-NP    | 0-0.120 mM       | 2.98 $\mu$ M    | Water              | Cryst. Growth Des. 21 (2021) 5558               |
| Zn-MOFs 4                                                                                               | FL quenching                 | 2-NP    | 0-0.170 mM       | 0.73 $\mu$ M    | Water              | Cryst. Growth Des. 21 (2021) 5558               |
| EY@Zr-MOF                                                                                               | FL quenching                 | 2-NP    | 0.01-1mM         | NR              | EtOH               | ACS Sustain. Chem. Eng. 7 (2019) 6196           |
| [Nd <sub>2</sub> CdL <sub>2</sub> (NO <sub>3</sub> ) <sub>2</sub> (DMF) <sub>2</sub> ](OH) <sub>2</sub> | FL quenching                 | 2-NP    | 0-640 $\mu$ M    | 14.73 $\mu$ M   | CH <sub>3</sub> CN | Front. Chem. 7 (2019) 139                       |

NR = Not Reported

## References

- Z. Li, Y. Wang, Y. Ni, S. Kokot, A sensor based on blue luminescent graphene quantum dots for analysis of a common explosive substance and an industrial intermediate, 2,4,6-trinitrophenol, *Acta A: Mol. Biomol. Spectrosc.* 2015, **137**, 1213–1221.

- 2 C. Wu, J.-L. Zhao, X.-K. Jiang, X.-L. Ni, X. Zeng, C. Redshaw, T. Yamato, Click-modified hexahomotrioxacalix[3]arenes as fluorometric and colorimetric dual-modal chemosensors for 2,4,6-trinitrophenol, *Anal. Chim. Acta* 2016, **936**, 216–221.
- 3 C. L. Zhang, S. M. Zhang, Y H. Yan, F. Xia, A. Huang, Y. Z. Xian, Highly fluorescent polyimide covalent organic nanosheets as sensing probes for the detection of 2,4,6-trinitrophenol, *ACS Appl. Mater. Inter.* 2017, **9**, 13415–13421.
- 4 O. Gungor, M. Kose, Selective detections of nitroaromatic explosives by monomeric and polymeric Bi(III) complexes, *Sensor. Actuat. B-Chem.* 2018, **264**, 363–371.
- 5 X. Zhang, L. T. Liu, W. Zhang, L. Y. Na, R. Hua, Detection of 2,4,6-trinitrophenol based on f-f transition of  $\text{Eu}^{2+}$ , *J. Rare Earth.* 2021, **39**, 952–958.
- 6 A. Narula, M. A. Hussain, A. Upadhyay, C. P. Rao, 1,3-Di-naphthalimide conjugate of Calix[4]arene as a sensitive and selective sensor for trinitrophenol and this turns reversible when hybridized with carrageenan as beads, *ACS Omega* 2020, **5**, 25747–25756.
- 7 F. Qiu, Y.-H. Huang, Q. M. Ge, M. Liu, H. Cong, Z. Tao, The high selective chemosensors for TNP based on the mono- and di-substituted multifarene[2,2] with different fluorescence quenching mechanism, *Spectrochim. Acta A.* 2020, **226**, 117583.
- 8 W. B. Liu, N. Li, X. Zhang, Y. Zhao, Z. Zong, R. X. Wu, J. P. Tong, C. F. Bi, F. Shao, Y. h. Fan, Four Zn(II)-MOFs as highly sensitive chemical sensor for the rapid detection of tetracycline, o-nitro phenol,  $\text{Cr}_2\text{O}_7^{2-}/\text{PO}_4^{3-}$ ,  $\text{Fe}^{3+}/\text{Al}^{3+}$  in water environment, *Cryst. Growth Des.* 2021, **21**, 5558–5572.
- 9 Y. K. Li, Z. H. Wei, Y. Zhang, Z. F. Guo, D. S. Chen, P. Y. Jia, P. Chen, H. Z. Xing, Dual-emitting EY@Zr-MOF composite as self-calibrating luminescent sensor for selective detection of inorganic ions and nitroaromatics, *ACS Sustain. Chem. Eng.* 2019, **7**, 6196–6203.
- 10 H. F. Chen, X. P. Yang, W. Z. Jiang, D. M. Jiang, D. L. Shi, B. C. Yuan, F. Wang, L. J. Zhang, S. M. Huang, Anion dependent self-assembly of polynuclear Cd-Ln Schiff base nanoclusters: NIR luminescent sensing of nitro explosives, *Front. Chem.* 2019, **7**, 139.

## Figures

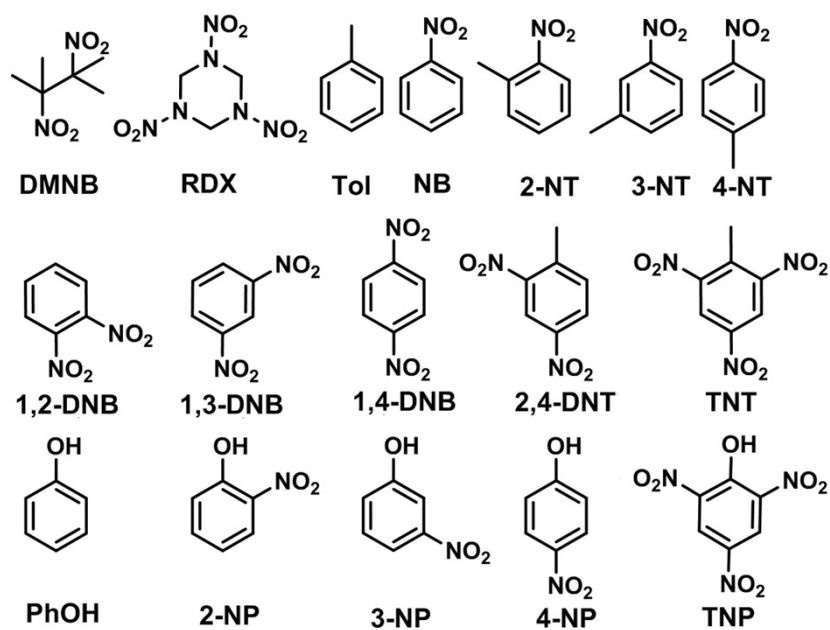

**Fig. S1** Analogues of nitroaromatic explosives discussed in this work.

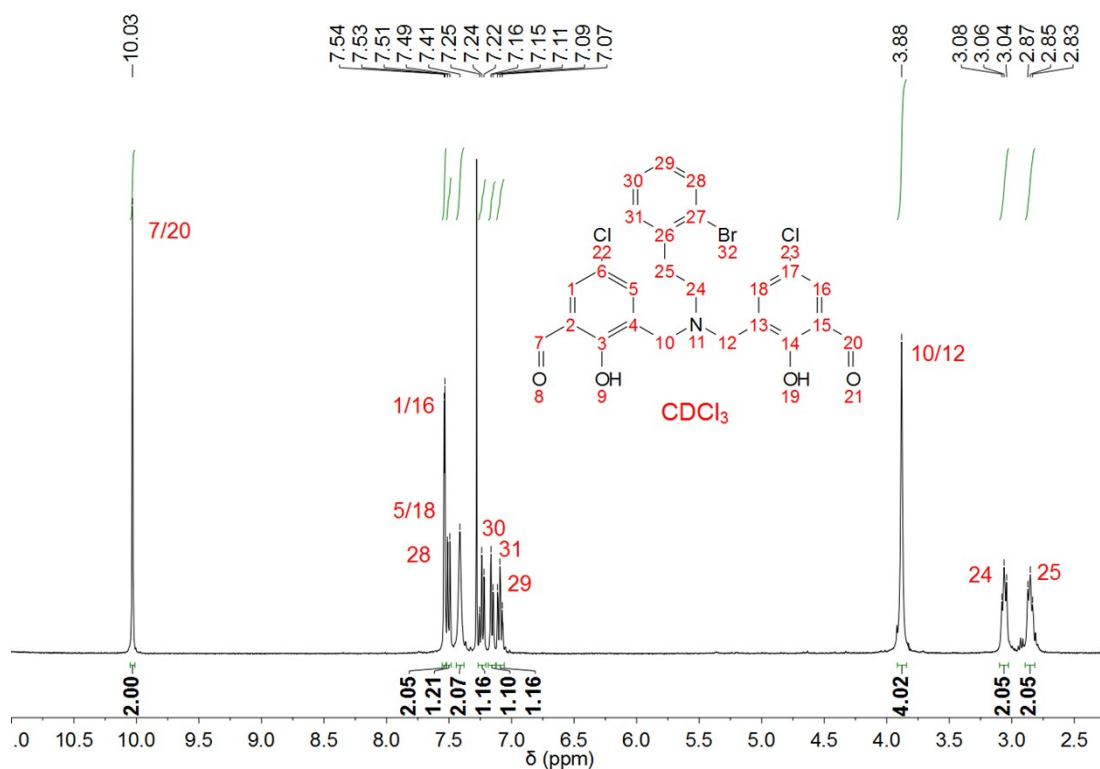

**Fig. S2** <sup>1</sup>H NMR spectrum of dialdehyde H<sub>2</sub>Q<sub>i</sub> in CDCl<sub>3</sub>.

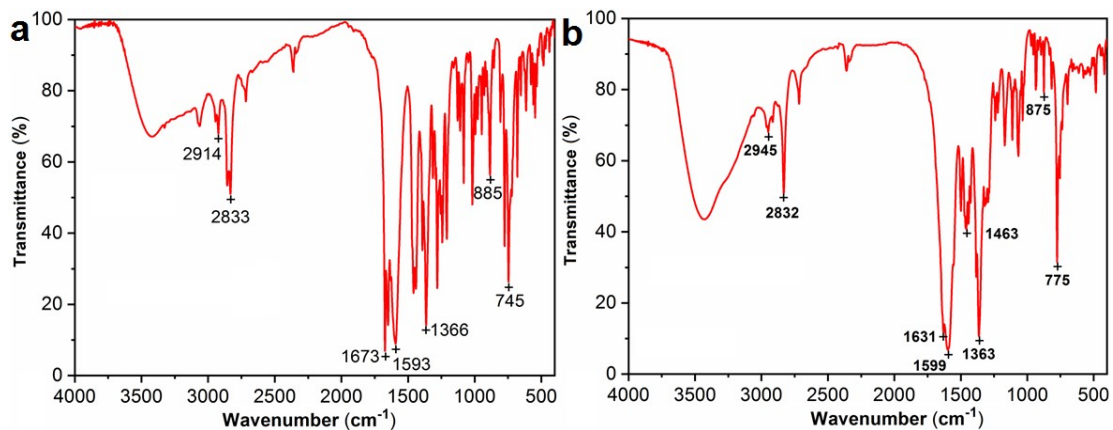

**Fig. S3** FT-IR spectrum of dialdehyde H<sub>2</sub>Q<sub>1</sub> (a) and Sm(III)-macrocyclic **Sm-2<sub>1</sub>** (b).

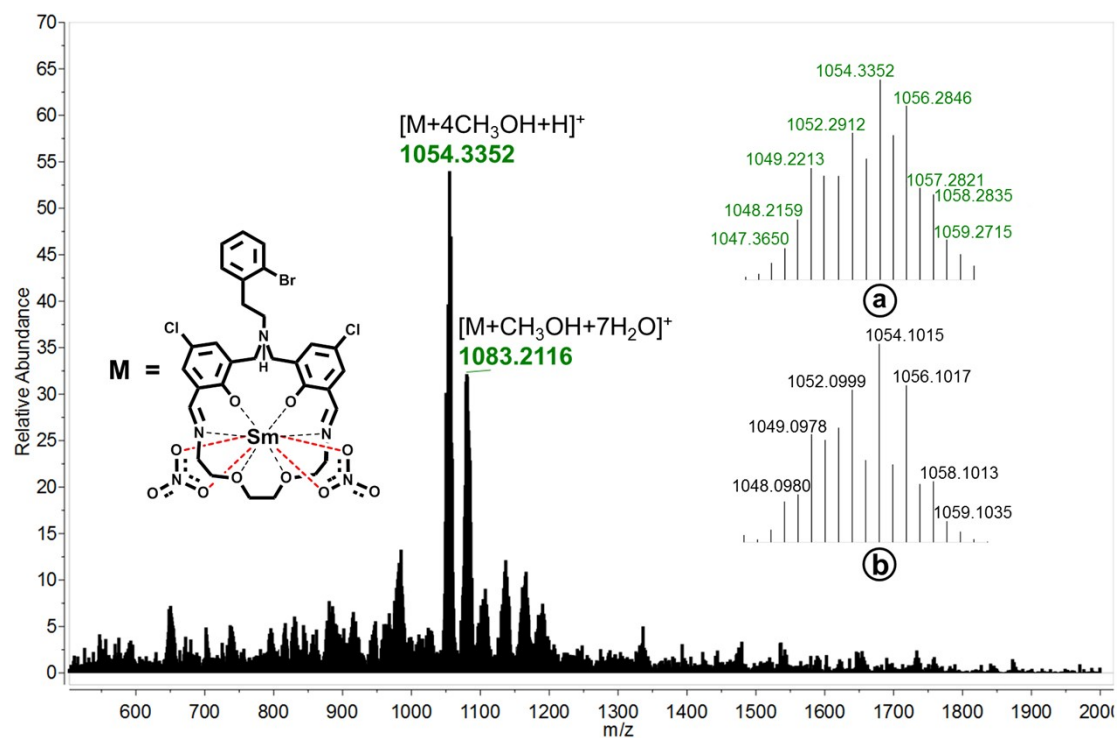

**Fig. S4** ESI-MS (positive) of Sm(III)-macrocyclic **Sm-2<sub>1</sub>** together with its inserted experimental (a) and simulative (b, calculation for [C<sub>34</sub>H<sub>48</sub>BrCl<sub>2</sub>N<sub>5</sub>O<sub>14</sub>Sm]) peaks of isotopic distribution corresponding to the peak at m/z = 1054.3352.



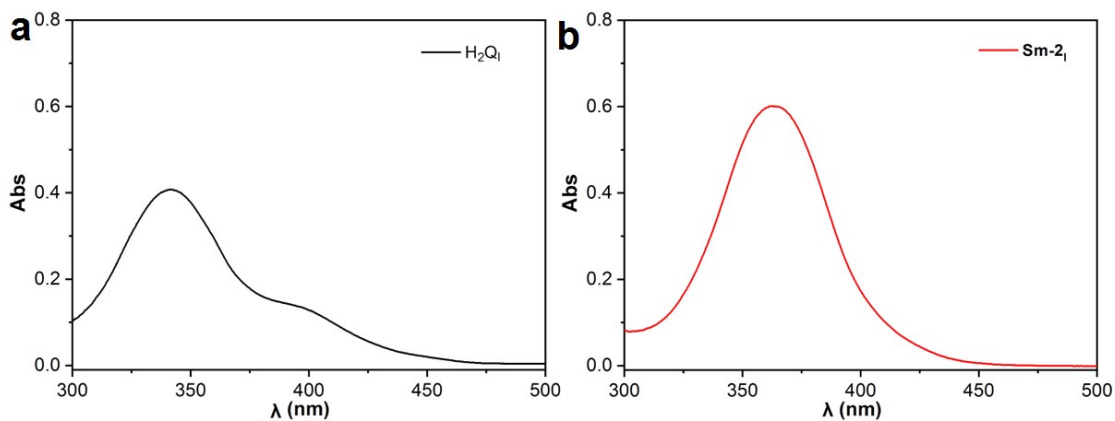

**Fig. S5** UV-vis spectra of  $\text{H}_2\text{Qi}$  (a, 40.0  $\mu\text{M}$ ) and  $\text{Sm-2}_i$  (b, 45.0  $\mu\text{M}$ ) in DMF.

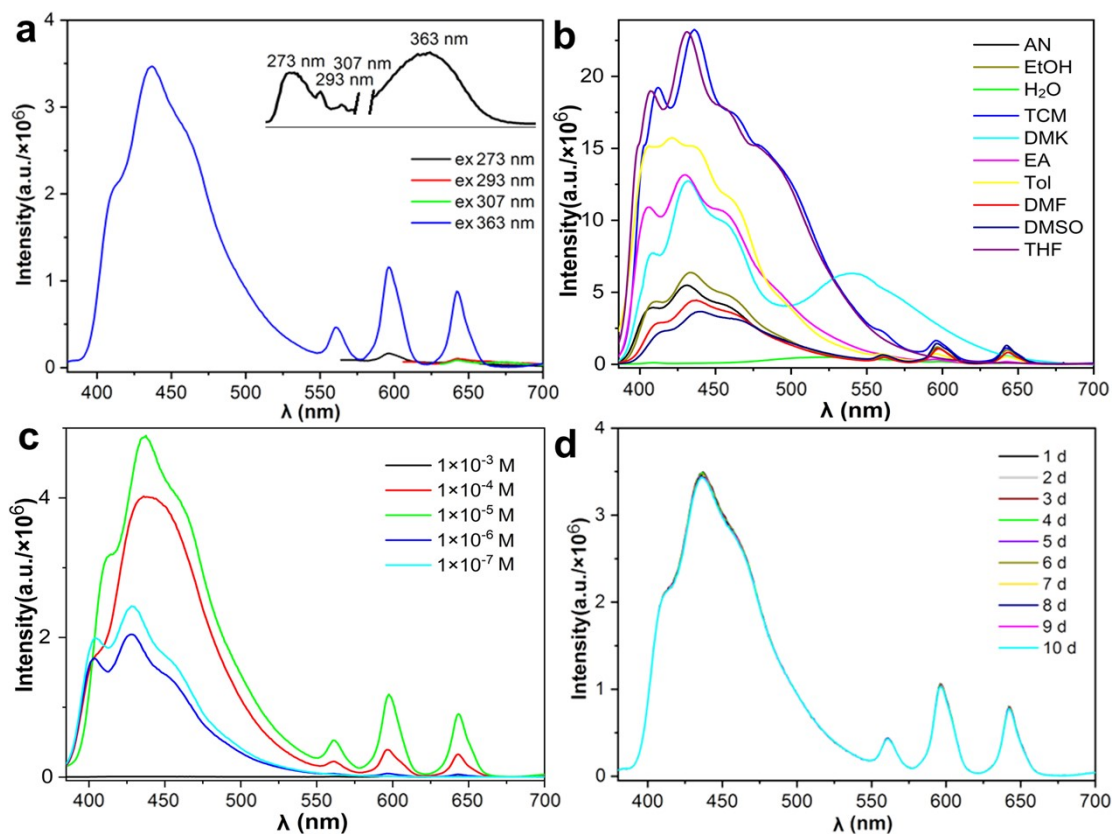

**Fig. S6** (a) Emission spectra ( $\lambda_{\text{ex}} = 273, 293, 307$  and  $363$  nm) of  $\text{Sm-2}_i$  (30.0  $\mu\text{M}$ ) in DMF- $\text{H}_2\text{O}$  (19:1, v/v). Inset: Excitation spectra of  $\text{Sm-2}_i$  ( $\lambda_{\text{em}} = 643$  nm, black line). (b) Emission spectra ( $\lambda_{\text{ex}} = 363$  nm) of  $\text{Sm-2}_i$  (25.0  $\mu\text{M}$ ) in 10 common solvents. (c) Emission spectra ( $\lambda_{\text{ex}} = 363$  nm) of  $\text{Sm-2}_i$  at different concentrations in DMF- $\text{H}_2\text{O}$  (19:1, v/v) and citric acid-sodium citrate buffer (pH = 6.0, 5.00 mM). (d) Time-dependent emission spectra of  $\text{Sm-2}_i$  (30.0  $\mu\text{M}$ ) in DMF- $\text{H}_2\text{O}$  (19:1, v/v) at 298 K.

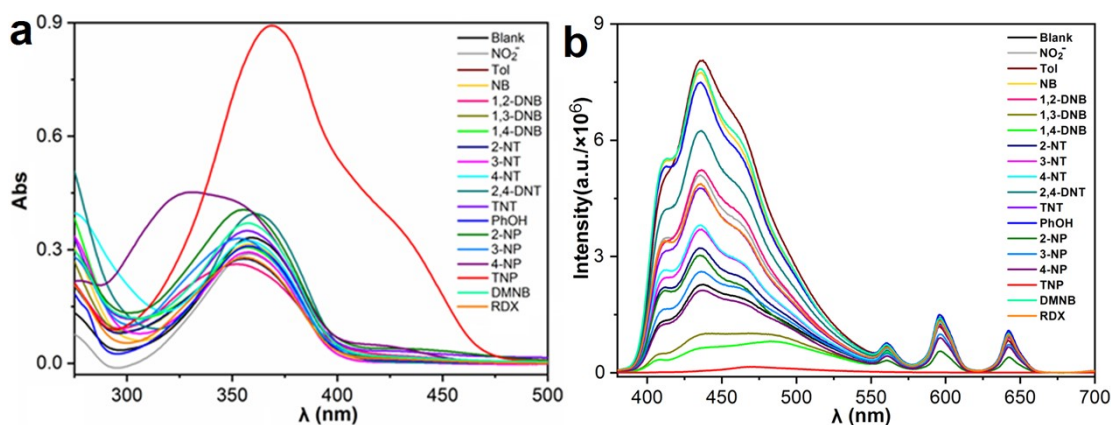

**Fig. S7** Absorption (a) and fluorescence (b) spectra of **Sm-2<sub>I</sub>** (25.0 μM) mixed with explosives (125.0 μM) in DMF-H<sub>2</sub>O (19:1, v/v) and citric acid-sodium citrate buffer (pH = 6.0, 5.00 mM).

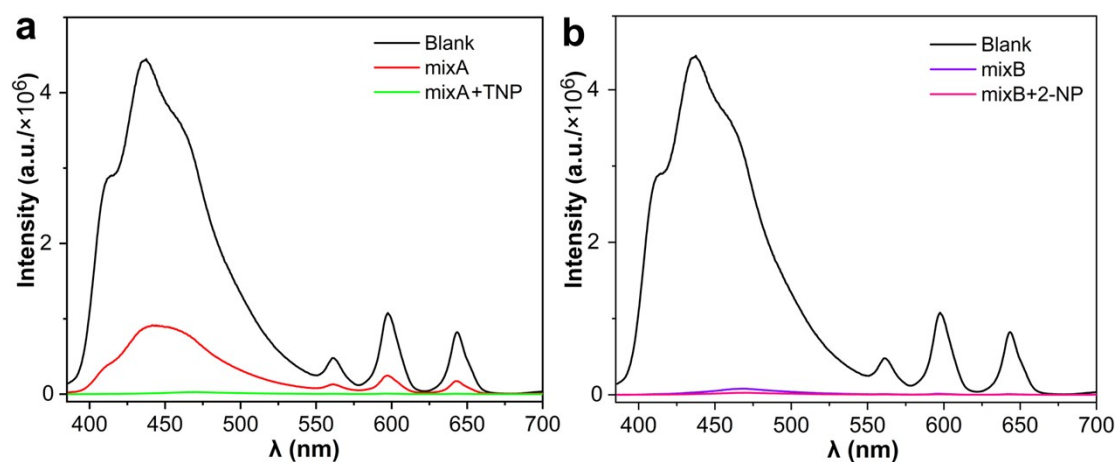

**Fig. S8** Emission spectra ( $\lambda_{\text{ex}} = 363 \text{ nm}$ ) of different mixtures contained **Sm-2<sub>I</sub>** (25.0 μM) in DMF-H<sub>2</sub>O (19:1, v/v). (mixA: mixture of 17 explosive analogues without TNP, mixB: mixture of 17 explosive analogues without 2-NP)

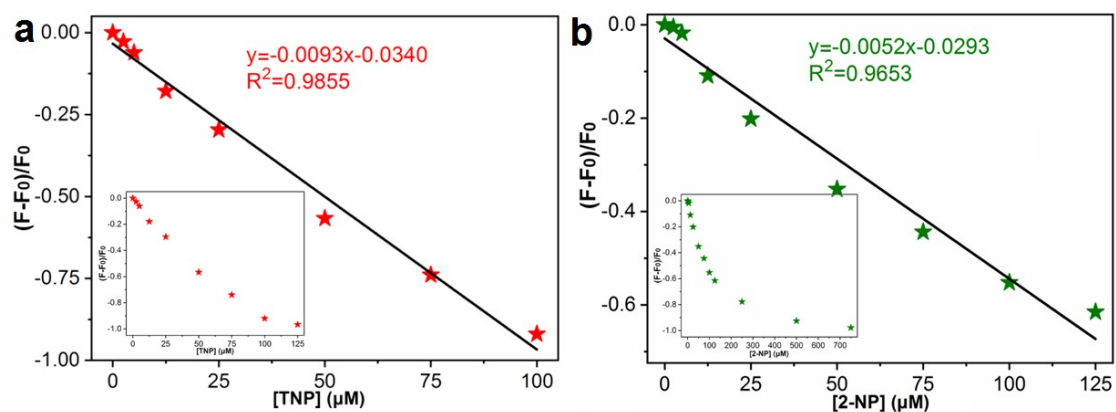

**Fig. S9** Fluorescence changes of **Sm-2<sub>I</sub>** (25.0 μM) upon increasing TNP (a, 0–125.0 μM), 2-NP (b, 0–750.0 μM) ( $\lambda_{\text{em}} = 643 \text{ nm}$ ) versus the concentration of NEs in DMF-H<sub>2</sub>O (19:1, v/v) and citric acid-sodium citrate buffer (pH = 6.0, 5.00 mM) at 298 K.

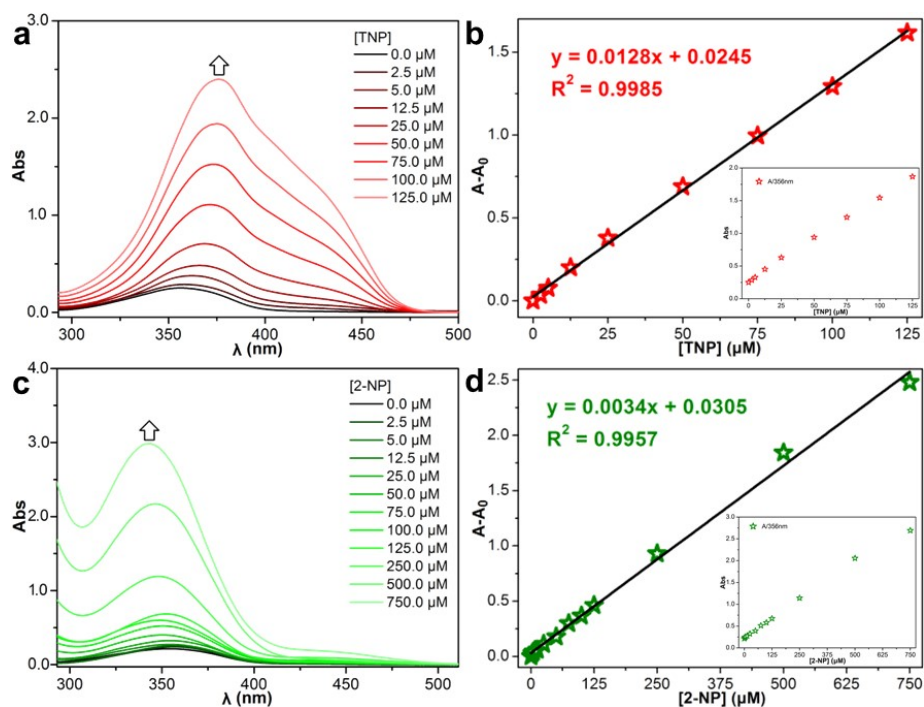

**Fig. S10** Absorption changes of **Sm-2<sub>I</sub>** (25.0  $\mu\text{M}$ ) upon increasing contents of TNP (a, 0–125.0  $\mu\text{M}$ ), 2-NP (c, 0–750.0  $\mu\text{M}$ ) together with the inserted linearity of absorbance (360nm) versus the concentration of NEs in DMF-H<sub>2</sub>O (19:1, v/v) and citric acid-sodium citrate buffer (pH = 6.0, 5.00 mM) at 298 K.

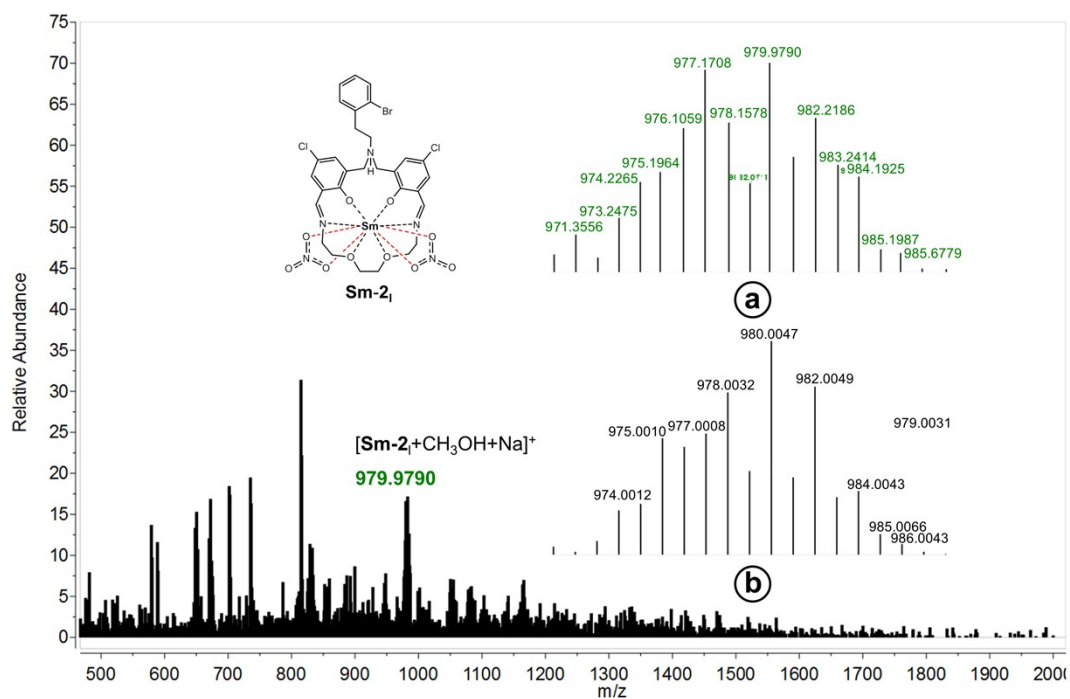

**Fig. S11** ESI-MS (positive) of Sm(III)-macrocyclic **Sm-2<sub>I</sub>** (25.0  $\mu\text{M}$ ) mixed with TNP (125.0  $\mu\text{M}$ ) together with its inserted experimental (a) and simulative (b, calculation for [C<sub>31</sub>H<sub>35</sub>BrCl<sub>2</sub>N<sub>5</sub>NaO<sub>11</sub>Sm]) peaks of isotopic distribution corresponding to the peak at m/z = 979.9790.

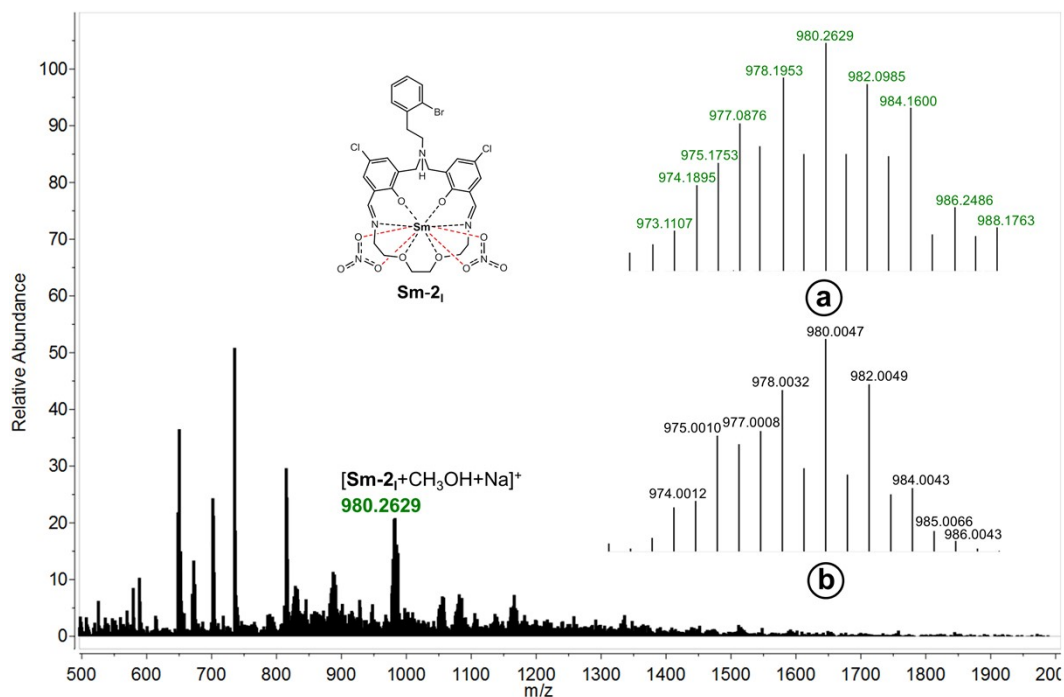

**Fig. S12** ESI-MS (positive) of Sm(III)-macrocycle **Sm-2<sub>1</sub>** (25.0  $\mu$ M) mixed with 2-NP (125.0  $\mu$ M) together with its inserted experimental (a) and simulative (b, calculation for  $[C_{31}H_{35}BrCl_2N_5NaO_{11}Sm]$ ) peaks of isotopic distribution corresponding to the peak at  $m/z = 980.2629$ .

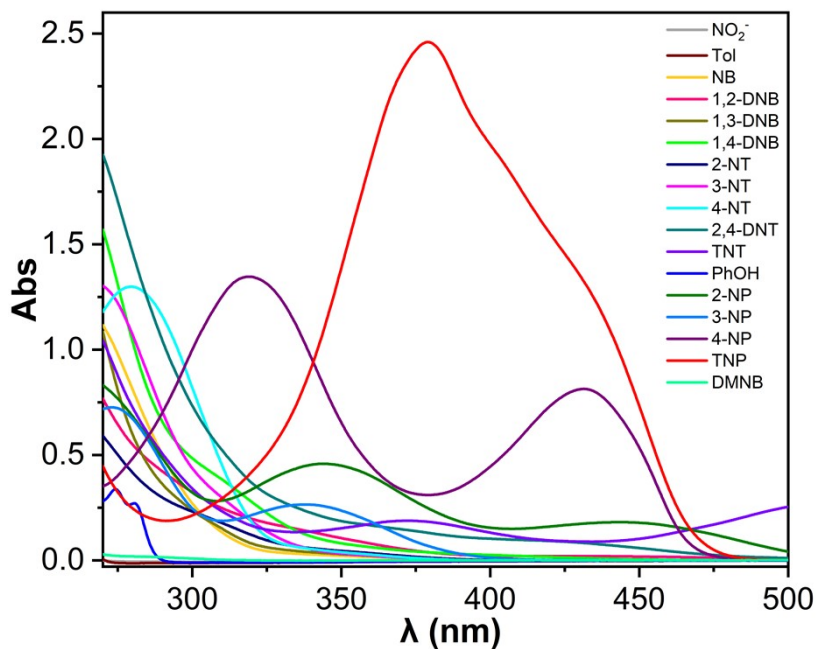

**Fig. S13** Absorption spectra of explosive analogues (125.0  $\mu$ M) in DMF-H<sub>2</sub>O (19:1, v/v).

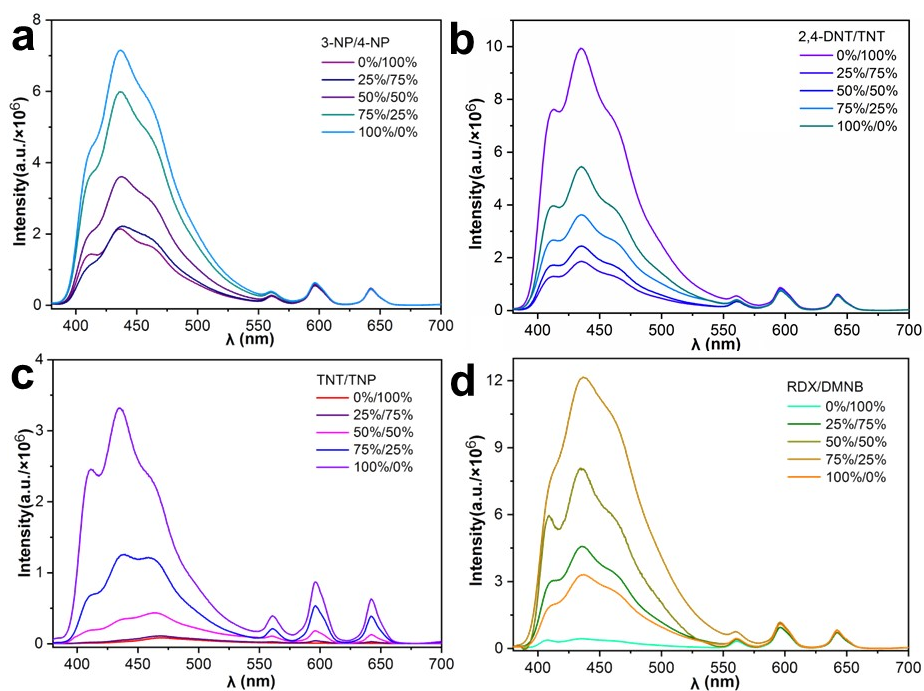

**Fig. S14** Emission spectra of **Sm-2<sub>I</sub>** (25.0  $\mu\text{M}$ ) under the presence of serial two-component mixtures: 3-NP/4-NP (a), 2,4-DNT/TNT (b), TNT/TNP (c), and RDX/DMNB (d) in DMF-H<sub>2</sub>O (19:1, v/v) and citric acid-sodium citrate buffer (pH = 6.0, 5.00 mM) at 298 K. For mixtures, we set up a series of five contents (0%, 25%, 50%, 75% and 100%) for one component.

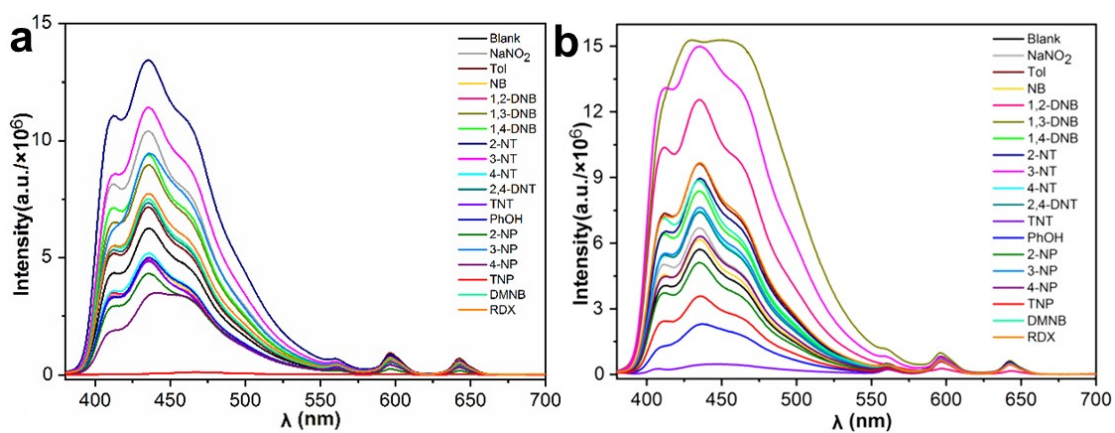

**Fig. S15** Fluorescence spectra of **Sm-2<sub>I</sub>** mixed with different contents of explosives (a, 125.0  $\mu\text{M}$ ; b, 2.5  $\mu\text{M}$ ) in real water samples.
